# Supplementary material for: Bioinformatic Analysis Predicts a Novel Genetic Module Related to Triple Gene and Binary Movement Blocks of Plant Viruses: Tetra-Cistron Movement Block
Source: MDPI journal article supplement (doi:10.3390/biom12070861), 2022-06-21
Supplement: s1 [file s1]

ACTGTTTTACAGTGCTAAGTGGGGCTGTTTGGTTTTTTTATTGCCGTAATTGGAAGGGCGTATAATTGGGTTTTTCTTACCGAC  
ACAGTCGACTGTTGTCAATGTTTTTAAACACAATTTCACACACACCCCGAAACCTACTGGGATAATCCACCGGATCGCCATCC  
CCTTGCGTGTAAGCAAAAGGTGAAGATTGAGGATAATTGCAAAACCATAAAACAGAAAACACAAAAGAAGAAGAAAGGAAGAA  
AATACCGAACATGGCGAACAGAGAGTCATATACGCCATGGACAATGGACACCAGGATGTATGCCCTGCGAAAGTTCGTGAGGG  
TATCAGACCTGGTGGCCGCCATTAACCACCTCAAAACGCTAGACTACGGTGTTGTGGCCAACCGTAGAGCGTTGAAATTAACA  
CTATCGACCCTCGGGGACAGCGGAATCTTTAGCAGGTACACAAGTTTTCCCGGCGAAACAGACGATGGTTATGTGATGTACAT  
GGACATGCAAGCCATGCCCTTGTCCACACACATCGAAAGTCTTCTAGCGGCGAGTGACACCAACGTGCCACTACCGAATTCGG  
CGGCTCCTAACAACAACGGAAGACCCCTGACGGGGCCGGTAGAGACCAGTCGAACGATTTCGTCTGTTCTCGATTACAAAAAC  
CTCAGCGGATATCAATGCTGATGACCAATACCGTCTGTATAATAACACAAGAGACCTTTGAAATGGAAGGCGGCTGACCTG  
GGGTTAGCAATTAGCGGTGGCAGATCGAGCATCCTACAGGAACTACACGAGGAGGTTTCGAGAAGGCCGTAGCCACCGCGGTGCG  
CGCTGAAGTACTTCCCGGGGACGAACCCGTCGAAGGAAGAACAGGAAATCTGGAACGCAGGAGAAGTACCGGCAGTTTACAGT  
CGGACGGACGTTTTTCTGGCCGAGAGAAGAAAACATCGTGCCACCTCCGTTGGTTCGTGCTGTGGAGTCTAGTTGGTTGATACC  
GACTATGTGCTCCATAATAATAGCCGGCGGGTGGTTCATGATGGGTTTGAGCAGAAGGTACCACCTGGCCACCTACCTAAAGA  
TGTATCTGAGGAACATGAGGGGAGAGTGGATCAGAAACAGGAACAACAAAAGGAGAGATGGCGGTGGCGATCCAGGGGCCCGC  
CGGTCACAGAGATGGAGAACATTCAGGAAAGAGAGACCCAGAGCCACCCAGGGCCAAAAACACAGGATTACAGGGATTGT  
AGATCCCTACGAGGACATTGACGAGCCCTGAACTGGGATAGTGACGAGGGCGTGGTTCGAGTTCGTACCTCTCCATGCTAACGC  
AGTGGCGCATGTGAGATTGGAGGTTTTGACCTTCTTACTCGACATGGACGTGAGCTGTACGAGCTGGACCTGTCTGTTCCCTG  
GAAATACTGGTGGAAACACACCCAGTTGCCACAACCGACCCCTTCGTGAGAGCACAACCTAACGTGAGGAAGGATGGCACTGTG  
GTCAGGACCGGCCACATCCTACATCCAGCTGATAAACTGTGAAACGCAGCATCAGCCTGGACCAGAGGAGCCCAAGGAAGAAA  
GGAATGAGGAGACCTCAGACGTCTCTGTTGCGAGAATAAAAGCAGAGGTGGAATGGAAGGATAAGAGCGGATCTGGAGAAA  
CACAGGTTGGAAGGGGAATGGTCCAGAGCAAAACGCTCAACAAAAATATGAAGTCGCAGTCCCCGACATGAACGGAGGGTTCAA  
ACTGGAACAGCCTCGCTCTCACACCTACAGGCTATGAACTGGCCTACGACCTGAGAGTCAGTTTCGGCTGAGGAGGAAAAAC  
TGAAAGCGTTGACCAGCAAGCCAAAAACCGAACAAGACTCTATGTCCATTGGGAAACATCCAAAGGAGATAGAGTTGCTGGAA  
AACCAGATACTAGCCCAAAAGTCGGTTCGTGGAGGCCAAAGAGTGGTGTGGCAAACCTCGCAGACCCCCACAGAGAGGTGGAT  
ACAATTGGGTATAAACACAGGGACCCAAATTGCGACGACCGCTGTGCAATGCGCGGTCTCTACAGAGCCGTGGGGGCAATAA  
ACACAGCGGGGGCAGTAGCATCGGCAGCAGAGAGTGTCCAAGGACACAGGCTGGGAGGACGACCCAGAATGATGAACATTTC  
GATCTGTAGAGTAGAGACCTTGTAAAGTAGGAAGAACCGTAGCATTGTTTCAGGAGTTAATAGTATAAACACACAGTAGCAG  
ATATGGGAGATAGAGTAGTGAAACTGATAGAGAAAAGAGAAGCAAGTTAGAAAAGGAAAGAGCTAGGAACCTAAAGCGTTTT  
AGGATTGTAGAGGTAGAAAAGGGGGTGTGGTACCAGTTAGAGGAAGGAGAGTGTTCGTAGCAAATCAATACACAAACATTG  
TGCGAAGTGTGGCGAACCGACGACGGTACTGCGTTATGTGCAAGTTCGGAACCTACGCGCAGAGCAAGCATAACAGACGCGTA  
ACGAAAGAAAATGAAGGTTGCACGTACAGTTGCATTACTGGTTTTGGTACTGAGTACCCTAGGGCACGGGGCGGGGTCCACCG  
AGTTAGATTGCAAATCAGCACTCCAGGTGCAAAACCCAAAGGGCCTATGAGGACCTGCCCATCTACACCTCCAGGAGGGTGGGA  
AATCTGTGGTTTCAGCCGGGTGGACTGCTACCTAGGGAGCGCCTACGGAGTGGCCGGAAGAAAAGAGTGGCGGACTGTCTGGC  
AGCAGGAGTGTGGTGAAAACCTGCCACTGCGATGGCCAAAGCACTCAAAAGACGAAGTCTTTCAGATTGTGAGAAAGGCGATA  
GGAGACACCCCAACGTGGACTTCTTCCCGAGTCCAGGCTGACATGGCAAGGTTGTTTTCTACAGTCTATACTGGAGAAAAC  
AGCGGAGAACATGTTGGCCGATCTGGACAAAATGTCTGAGTCAGAGGCCCTTCTACCCAATAACCAGGGAAGCCTACGAGAGGA  
TACCCGAAGACGTTGGGAACAGAAAGATACACGTCTACAAAGTCGGGGGAGGACCAGGCTGTGGCAAGACCACCGTAATAAAG  
AAGATATGCAAGGAGGAGGAATTATGCACCGTCATGGTTCCTTTTAAGAGGCTAAAGGCGGACTACACCGTGGAAAGATGTTT  
TACGCAGCACACCTGCGTCGTGAGAGAAATGGCGACAAAGATACTACTGGTGGATGAATTCACCGGGTGCATGTGGGTTTTGG  
TATGTGCGGCGCGGTTAAACCAAGGTGCTCAAAGGTGATACTTTGGGGAGATGTCTGCGAGATTGGCTGCAGGATGCAGAA  
GGGCAAGGTTTTCAAAGACTTTAAGATACCTGACTTTGCAGTAATGAGAGGCAATTACAGGAATCCAAGGTCCGATGTTCTGT  
ACTAAACTCACTCTTCGGAGACAACATGGCGCCGATGAAGAGTGGGAGGGTGTGCAAGTCAGGGAACTTTTTGGGGATCCAC  
TGGAGGAAGAAGGTGTGAACCTTGACGTTACGAGACAGAGTGTGATGAGTTGTGCGATCGGTATTTTCATGGATGCCATTACT  
GTTTCGGTCTTCTCAAGGGGCTACTTACGATAAGGTCAATTTGTTTTGTGTTTCATGTGGGATTTAAATATGTTTACAAATGCGGC  
TTTATTGAGGGTAGCTTTGAGTAGGCATAGGGTAAGGCTGGTGATATACACTTGTACACACCCATCTGCAAGGGACATAGTCG  
AGACGGGTAGGATAACAAACGACCAACTGGTTGGCATAGATACCCACGAGATCAAAGCCTCTCTAGGTTTTGGTAGCCACAATC  
AAGAGACTAGTAGGTTACTGATGTCTGGGAGGGTGTGACGCAGAGGGCAGACTACACGCCCTTGTTTGTGATTGTTGGGGGC  
GTCTTAATTCTGTCCGGGCTGTTTATGTTCAAAACGCCAGAGAGAATTCACCTCCGGTGGAGATCAGGGGGTAGCTAGTTTACG  
GAACGGTGAAGCTATACCGACGCGAGGAAGGCCGTCTCAACCCGGTCCACAAAGTGCATGACCAAGCAACTCAAAGGTCA  
GCGCGGCAGGGGCCGAGGCGATTCTACTAGTCACCTCGGTGGTAATTTGTTTGATCCTAAAGTGGATAAATGGTCAGGGAGTA  
CAAAAGAGAGACGACCTATAATGGGTTGTACATGGCGCTAATAGGGGTCTATTGATTGTGGCGTACACAGTCAAACCGAGTT  
TCGAACAAAAACACTCGGGGGGAAATGGCTTGCCAACGTTTGTGAATGGAGGGACATGGGAGAACACACAGACGCAAATAGCG  
TTTTCTGAGGGGACAAGGTTTACCAAGGAGGGGAAGCCGTATTTCCAGTCGATCGGTGCGCGGACGACATGATGTATATACA  
CGTGTTAACCGAAATTTGTGAAGGAGTGAGGTTGATGTTCCGAACCATTCGACTCATGTGTGTGTAGTTGGGTTTAGTCTTT  
CGTGGAGAGTTATGAACCTTTTTTAAAGAGCTCAAATTCGTGATGTTTCATGACGATAAAAGAAATAAATAAGACAGGCACAGC  
CTGTGACAGAACTTTCTGTCTAGAAAGAAGGTGGAGACACCTTCTTCGACAGTATCCGAGCAAAGACTCGTAAAGGTCTGAA  
GGAGAAAAGGTTAATCTCATCCCGTTTGAAAGGGGTGGGAAAAAGATTAGCGACCAGTATATTGGTCTA (n)
