# Supplementary material for: Bioinformatic Analysis Predicts a Novel Genetic Module Related to Triple Gene and Binary Movement Blocks of Plant Viruses: Tetra-Cistron Movement Block
Source: MDPI journal article supplement (doi:10.3390/biom12070861), 2022-06-21
Supplement: s1 [file s1]

CCGGCCGACATTTATGTTGGACTTGATAGGGCGTATGTGTTTTGATTTATGCTTACTTACGGATGCCATCTTGTTAAGGTTTC  
CTTTTGACGCTACGACTGCTGTACGAAATCTTTTAGACAACAGGCGTCCCGGCAGTAAGCAAACGATCATTACCTTTTCGCTT  
ATCCGTTTCAGTTCGTAATGTGCGCCGGTAACTTTGCTCATGCTGTAATTACTGAAGGGTGGGCTTATTTCTCGGAATACGAA  
AACGTTGGTGGTGCATTGGAGTCTGCACCATGGGTTCTTGCTGCTGAGTGGAAAGAGTTTCAGTTAACTTTATCTACTTTCAA  
CTTTCCATTACAGAGCGAACGCGACGCTATTCTGAAGGCGATTAAGAAATCTTGATATTAGCTGCCCTTTTCAGTTGGGAGGGTA  
GGTTTCTGCTCGTGAGTTTGGGTCTGTTTGAAACCAGAACACACTGCATTGCTTCAACGTCTCGCTCACGCCGCCACTCAC  
AAGGAAAAATACTCCGAAGTGCCTGAGTTGGCTCTTACAGGTGGTGGGGTGCAGTTGCTGGTCTTCTCTCTCCTCCCCCTGA  
TCGTGAGGCAGCGTATCCTGATAAGGGCGAGGCGTCCACGCGTACTACAAAGGTTTGCAGGGTCTTGTGATTTCTGATACTT  
GGCATCGAAGAAGTTTGTAGAAAGCAAACAAGTTGCGGTGGATACGGGATATCGAAGAGCCTGCTCCTGCTCCTTCTGGTGGG  
GGAGGAGGTCGTTCCGGTGGTGGTGCAGTGGTCTTGGTACTGGTGGTGGTGGTGAATCCAAGTCTATATATTAGAGGACGA  
CGGACGTGGCGACTAATGGCTGGGTGACCTTCCGTAGATATGCTGGCCTAGACGGAACGGTATGGGCTGTGAGTTTCAA  
AGTGGACGAGAAACACGACGTGTTAGAACGTTGGGTGCGGATCCTTTACCTCGACATGAACACTTGGTGATCCCTTCCA  
TGGCAATGAATTGCTATGGTTGGTTTGTGGTATTTACGGATTACGACACCGACGGCGTAGCTACTAGAGCTGTGATGCAGGA  
AGAGCTTTGAGAAGTGATATCTTAGCTTTGGGTGATCCGTACATATTCACAGACAGAGCTCTAGATGCTGCTAATGTGCAGAT  
AGAGGTGCTGAGATCCGATGTGGTTAAGCTTGAGGATACGATACGACAGTTAGCATTAGCCGGTGGCGGTAAACAATGTACAGT  
TGTTAGAGGAACCTTAAGGAAGCGCTGCATTCGTCTCGAGAAGAGTGTAGAACGCTGAGACATCAGGACGCTATCAAGACGGAA  
GAATTGTTAAAATCGCAGTCAGAGGTTACCGCCCTGCGATCCGACTTGAATACGGTCCGTAATGACTTGTTTGCTTTACGGCG  
ACATGCAAAGGATACCACTTCATCTTTTCGAAGGATGGTCAGTTTTCTTTGCCTGACGCTAGGTCTTATGGGTGGAAGATAG  
TTTGTAAGAAGGAAAACCTTCTTGGGCTAGCACCAAGGTATAAAGTTGAAGATGGTGTCTGCTTGTGACACAGGAAGGAGAT  
TTGATTGATGGGTACTGGTCTGACGGTAGGCCGACACTCTTTTAGCTAGGTTTGGAGCAAATTTTGAGATTTTACTTGGAG  
AGATGGTGTTATGTTTGAATTCGTGAACACTCCAGGTGGTGTGTGTTCACTGTGTTGGGATACTCTCAACACTGGTGTGTTGA  
GAGCATAATGGTATGTTCAATAATGTAAATAAATAATTGCAAACATAAATACGATTCTCTGTAGTGATAGAATGTCTAGGTCT  
TTTCTCGTTCTCGTTGTGTGTCTTAGTTGTATCTTCTAGGGTTGAGTGAAGGTAGAGTTGCTAAAACGTGACATTGTAG  
GAATATTTTGCAGGAAGTACACAAGCCAAGGGTGGGTGTTGCCAGTCTACTTTACGTACAGTTATCTAGCGGCCGACGGTG  
GTATTTGCTGGGGTTCTTCTGTTTCTGCATTTGGTATCACAGAAAGAGCCCTTAATTACAGAACAAGAAGGTTGCTGAATGC  
TATTTCTGCTAAACACTTGCTGCTTGTCTCGGCGACTATGACTGCTTCTGTCCCTACGGCAACAGGTGTGTTTCTGAACCTCT  
ATCTAAAAGAGACACCTAATGTCAAGATACAATGTGCGGCCCATAAAATTTTTCAGGGAGGAAGTTGGCCGACATATTGGAT  
CGAAGTAGGGATTTCTTAGCTGACAGGTGGATGAAATGTCGATGACCGACCCCTACTGGAATGATTGCTACGATGCCTTTAT  
GGCCATGCCTTGTTTCGTGTCAGGAAACGTTGTCAATATGATTGCTGTCACTGGAGGTCCAGGTTGTGGAAGACCGAAGTGATAA  
AGAGAATATGCAACGACGTGGATAATTGTACTGTATGGTCCCCTTCAAGAGGCTGCAGACCGACTATCGGAATGGTGAGAGG  
TGTTTTACACAAAACACTTGCGTTGCTAGGCACATGACACCGATCTCCTTGTGTCGATGAGTTCACAGGGTGTGACATTGG  
TTTGGTATGTGACGACGCCCTGAATCAGAAGTGTTCGGAAGTTATTCTGTGGGGTGACATTATGCAGACTTGGCTGTGACACT  
CGGAAGGTGTGGGGTTTCGGGATTTCAAGATACCTTGTGCGGTAAAGTTGCGAAGCAATTATAGAAACCCATATGCGACGGTG  
ACGCTATTGAACAGTATATTCTCAGACGACATGGTTTTCTATGTCTGGGGATAAATCTTACGGCGTTATTGAGGTTAAACCGTT  
GCATAATACGGTATTTATGGATGGTGTGATTTGACCGGCACAGAGAGAGTGTGGATGAGTTGAGGGATTGGTATATACCGG  
CTGTTACGGTAAGGTCGTCGCAAGGAGCGACGTATGATGATGTGAATTTGTTGGTGTTCAGAGAGATTTAAATATCTTCACA  
AATTCATCGATCGTACGTGTGGCTCTAAGTGTGTCATAGACGTAACCTTACCATATACACCGTCGATTGCCAGGCCTTCGAGAA  
ACTAGTTACCACAGGCCGACTGGTAAACGACCACCTTGTGGGACTAGATTGTATGAAATTGGGGCCAGTTCTGGTTGGTTTC  
AATCTTGGCTTGTGTGGTTCAAATGTCGTCTTCTCGGGTTATAAATCAGAGGGCTGATCATACACCCACTTTGATAGCGGCTG  
GAGCTGCCATTATTTTGGGTGGCTTAGTAGTGTGCTTGTGTTCTGAAGCCTCAAGAGAGATTTCACTCCGGGGGTGATCAC  
GGTGTGGCAAGTTTTCGTAACGGAGGTCAATTATTCTGACTCCAGAAAAGCTGTGTTTTACCCGGTGCATACGGTTCACAATCC  
CAACGAGGGAAAATTAACCCTGATGCCTGGTCACCGTGATAATACTGGTTTTGGCTCTCATAATAAAGTTTAAAGATGGCA  
AGGATGCTAAGGGAGAGGACGCGAGCACATAGTTTTTATCCTTGGTTATGTGTTGCTTTTATTGTGTATATAGGTTGGCGTCT  
TTATCCAAATACTGTTTCTGGAGGGAACGACTGCCCGCCTTGTGTTAATGGTGGTACCTGGGAAGATTCTAGAGAGATGACTT  
TCTTTCCAGAAGGCACCAAATATAATGTTAGGGGAGATCCAATTATTCCGAACCTCTATAGGAGCGACGAATTGGAAGTGATA  
CGCTCTTTTCTGAGCTGTGTTACACATTGGTTCTCACCTTTATTTGTGGATTTTGGACCATTGTTGCGGTCAATTTGTTATAA  
AATATTACGTGCGTAAAGTGTGTAGTTGCAAACACGTGAGTGAAGACGTTAAAAGAGCAATTTCTATTTGATGAGACAGTAT  
CCGAGCAAAGACTCGTAAAGGTCTGAATCGTCAAACGCGAATGCGTTTTCTGTATGAAAAGGGAACGATTATTGCAACTCTGT  
AGATAGAGTTTA (n)
