# Supplementary material for: Bioinformatic Analysis Predicts a Novel Genetic Module Related to Triple Gene and Binary Movement Blocks of Plant Viruses: Tetra-Cistron Movement Block
Source: MDPI journal article supplement (doi:10.3390/biom12070861), 2022-06-21
Supplement: s1 [file s1]

LHIDSGLPiavTTVSRVRiFLSLVSR[REDACTED]ASLVTETSVSLLDTSTVDINNMGDVDTVGSSSCVGSASISGLRSGSLGFGVGISDDAVLCdyTSVCF  
TPYEISLFRQFAVTDaFIADARCYRALLGCFaKGTlARKiILRDAFAEChGPlPiGLLYGLLDLiSKAHSDNIGHLiTLWSTPVYnLVTTGEHM  
LHVdSSVRCiNFFQllMLVEDRCTQDLWVGMEAAATMINMSMATNAANMASGHASKAFEAeVKATPKVSViLSTEEKRSLQRLiGFcPLfENKLA  
VDNDHKVLYACRELARASyERASNCrNVNTKTLVVGSSWREVSNIiSNPNIDHYFfCGDGKDMVrTTiKALEEAAKVKWKMRASEKAeVRKRE  
SLDTVPTGVGTvADGTPKKHQVDVFLGMKGLLKQAKEEGQVPGRFLFDVvNYTKDPSRVYSSLLfEDVGYNfSERNWLELFGMTNAMVGyGYMA  
LPLELLfEDMPVTDKPVYRYNEStAWFCERSfLPEDGSSSFGRiRVTSASLSGNfTNGYEHpKDAWALMLRKPLWTHSSFSfALEVEITCRMGp  
MVCfTITRRDYiGAVVRTiALPEDLEYVRlMDLVAiSDRMKAkGSyTVCKPyPyfSARKAEVLALQSYLLSLDVKSLDLTNAMAYVRKMqNGAS  
LVEAKLAPKWDLKGTDMPKfVVAVYHSTLLLRakLYKDVDNiVCVEVNWKEKiKILKRTANLVLEPMQfIWSWLYTSHLADQIiILDMPNEHFQ  
RFECGSNGPGGMSKLGRDMSfSPiFSEEFHiGEERKVFHfPNHiSRPELDVGpVAENQDDiNQTTGHATAPNDRKGEVTySNfDFEDSKFHfKGA  
NPLLSfLKEGNKLrNDKDLHKSLLDFYNWRMEfDETTCSvCKALQgKTGAQIVECYHTGGPTVHNfSMtLTEVCDLRNKLKEDALKAPSGlAKT  
FEDTHKiLPVDAfSVEAEVEYiKGGPGCGKSYiIRALADPMLNLiAApFLKLrSDYQQVEVEGRKVDFRfHTQHKACQETGSSTiFVDEfTALD  
YQLLCViVLRCGASKVViVGDEQQTGiLESAGEGiNLNKiDVTcVNRHEPiVNfRNPahTVRLNLYLYGYNMiPASDSNGKiSfGSTLDFQES  
SVKKDTTLiHYSWATHDiLLCTDEDNKrDSKTTVRSNQGSTWENViLPiTEYDSKLTLNDSLNiVALSRHKGnLDiLLEGGDSCSPQVGTLRQM  
IEGVpDVVNREDYVLrQFLGLETPRACAPKRRETMLQKEfRELVDLYDGfVPYDEEWPRQPTVfHKQEEMSNDDYTDiASSSTSDNVpDTiPQi  
VEPiVTTDEEDCWSQEEDKKPLlQGfEMAKLTNfPTPVrHTiTTSRPNNCLiLALSEALPiSRTDiDTKLrNGSHRSAAfYSRWLDSSQMSTiL  
DVTAFAEFLDVRVSvKLINGDAiDDGHViKCGPMSARDVMiVYDGNLKHYYHDKNVRPKRaTFLDSLLKpSEKVARAVTERPiVEHVWKhGQDL  
iDVLKfYDCNYATfAVLNDfLDVSGPKLFSGAVYKfLPsSEKLYGVDLRCGGATLTtSEVLTRVSDDLQLEDrdNfGLRQTYMDYVNEyiPRST  
SSfLSAMVEDKGiVKEVRHVKPARDSYLLTGRVEYNSRQHYYDLNfLNEETHTMVGnKFVTGTIDMGfMAPLNQRGHpKTNQVKYKALTTGPALV  
YLKNSQWQTnHVLQERYLSTATSSMMSiAGVNTAKYiADLFVDECMdPNLDLVLDEETMNGLQLRAYGDMRiRNYQKQMNELDQAGANVCRfQL  
KDIEKvAKDSiNiAKAGQGIAAWSKVAQTkFMiPFRALNAALLKSLKPNVVDNSYSEEEfVQRANVALNQTPSiAKNGViDATAcDAGQNAFT  
QQiERYiIKRFGVSDEFLDRYfSFRSSYiLQSDHVRAHVKNiKTSGEpGTLFGNSiLMAALMNALLRGEgPWAMLMK[REDACTED]GVKRQANLQYNPVL  
VKAIRDnCTLDfKLDiDVPMQfCGYALVSGMLVPCVERKLAKiATHKfKSYEHfKEYQESLRDWVNrvPTDPTLYAiFMSANAeVSGVSYSMVE  
SMFEQIVSWSRVSGAQfELEfEDRVViIDEQPiDYSLaAVDTKPMKfSTSWAPRELgKMVD-iPVQVLKLHGLNRCHHNCE-LLSQYYNiI-  
WSiDVNPDiLSDNSiRARiLVKV-SGSfSKYDSRMKGC-fIAAL-IEF-K
